# Supplementary material for: Comparison of Anti-Inflammatory Effects of Flavonoid-Rich Common and Tartary Buckwheat Sprout Extracts in Lipopolysaccharide-Stimulated RAW 264.7 and Peritoneal Macrophages
Source: PubMed Central journal article supplement (PMC5591968; doi:10.1155/2017/9658030), 2017-08-27
Supplement: 9658030.f1.pdf [file 9658030.f1.pdf]

# Supplementary Material

## Comparison of Anti-inflammatory Effects of Flavonoid-rich Common and Tartary Buckwheat Sprout Extracts in LPS-stimulated RAW 264.7 and Peritoneal Macrophages

### Supplementary Figure 1

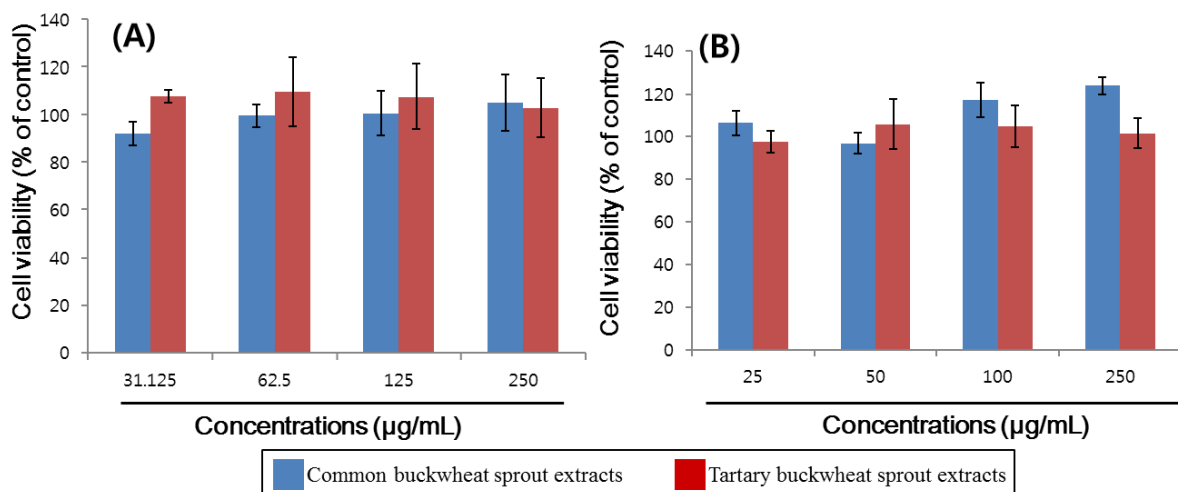

**Supp. Figure 1.** Effect of common and tartary buckwheat sprout extracts on the cell viability of RAW 264.7 cells (A) and peritoneal macrophages (B). Cells were plated in 96 well plate at density of  $2 \times 10^4$  cells/well for RAW 264.7 cells and  $6 \times 10^4$  cells/well for peritoneal macrophages. The cells were pretreated with various concentrations of samples for 24 h and cytotoxicity was determined by MTT assay.
